# Supplementary material for: Early instrumental meteorological measurements in Switzerland
Source: Copernicus journal article supplement (doi:10.5194/cp-15-1345-2019), 2019-07-22
Supplement: Supplementary file 1 [file cp-15-1345-2019-supplement.zip]

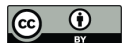

## *Supplement of*

# **Early instrumental meteorological measurements in Switzerland**

**Lucas Pfister et al.**

*Correspondence to:* Lucas Pfister ([lucas.pfister@giub.unibe.ch](mailto:lucas.pfister@giub.unibe.ch))

- [cp-15-1345-2019-supplement-title-page.pdf](#)
- [CHearlyInstMetMeas\\_Inventory.csv](#)
- [CHearlyInstMetMeas\\_Inventory\\_readme.txt](#)

The copyright of individual parts of the supplement might differ from the CC BY 4.0 License.
